# Supplementary material for: Combined metabolomic and NIRS analyses reveal biochemical and metabolite changes in goat milk kefir under different fermentation times
Source: Preprints.org preprint supplement (doi:10.20944/preprints202406.0780.v1), 2024-06-12
Supplement: Supplementary file 1 [file supplementary]

## Sheet: Supplementary Table 1
Supplementary Table 1. Metabolite levels in kefir samples identified by GC-FID
	Sample	Caprylic acid		Capric acid		Lauric acid		Myristic acid		Myristoleic acid		Pentadecanoic acid		Palmitic acid		Palmitoleic1 acid		Palmitoleic acid		Margaric acid		Estearic acid		Elaidic acid		Oleic acid		Linoleidic acid		Linoleic acid		Linolenic acid		Arachidid acid		Gadolenic acid		Eicosatrienoic acid		Behenic acid		Lignoceric acid
	RO	44464.8	1906.21	184851	1742.5	104549	2536.03	217631	8936.82	3808.21	78.7151	13638.5	84.5417	750349	16027.7	6801.05	146.166	20796.8	404.479	8877.72	127.293	293648	6204.85	5824.94	188.196	396345	8804.03	2896.53	37.2928	35916.8	849.949	2626	73.3694	6058.51	110.372	1012.13	2.22739	4044.39	38.311	1051.74	91.4925	301.137	261.121
	R12	42260.9	25359.6	171882	104981	95479.3	60952.2	196057	121103	3487.3	8756.01	12810.7	8756.01	733805	322027	7154.21	5355.52	20097.3	14373.5	9112.92	5824.98	321517	99823.9	6106.67	3900.74	398989	268842	3199.38	2080.7	30692.2	20209.7	2507.54	1762.9	6466.06	2957.14	1055	732.935	3643.62	2389.38	1958.12	864.145	1086.52	509.931
	R24	9377.96	3406.02	22477.1	16008.4	12812.7	8016.25	29412.5	16990	580.733	803.765	2981.21	803.765	241148	112755	574.523	476.742	2206.9	1513.05	1739.26	806.149	165131	46995.4	886.997	633.38	50258.7	33000.6	495.017	264.776	4359.23	2451.66	270.32	376.117	2613.52	429.421	97.3767	124.21	811.793	424.638	626.77	334.157	625.667	452.231
	R36	12749.9	1928.97	35236.4	7602.12	19988.6	4296.44	47359.1	8881.23	809.31	665.567	3031.62	665.567	364811	28230.6	1057.14	213.809	3677.24	771.269	2642.02	505.994	224691	16530.3	1505.31	331.022	82688.7	19549.8	794.033	215.071	7073.08	1460.63	492.303	137.299	3321.93	269.876	213.8	59.3619	896.05	187.499	874.1	460.949	1115.8	279.592
	R48	7691.64	544.115	12937.1	1002.32	4080.37	3545.06	19465.9	1662.84	0	473.155	1433.14	473.155	266641	30656.7	528.803	43.9166	1858.35	117.558	1338.75	86.0404	178506	26083.8	532.203	220.543	23373.5	1498.22	207.597	148.331	2420.91	319.213	0	0	2366.67	384.063	0	0	370.157	5.11477	398.7	86.6378	1095.94	140.147
	PO	45935.9	1760.97	208345	2440.03	125301	316.328	251792	1897.49	5487.23	114.123	17773.8	114.123	773325	6083.83	7544.44	49.7866	24631.3	136.546	9821.24	58.0743	301887	865.138	6798.39	67.8729	467648	1919.87	3410.18	13.4387	37470.8	2100.85	2722.02	141.447	7001.3	79.4186	1227.25	8.33317	5607.79	93.0087	1470.94	60.5801	420.29	41.0472
	P12	37738.4	28575.7	168695	119164	99336.8	66423.2	203386	131537	3903.86	8703.08	15596.7	8703.08	664203	357440	7416.87	5269.72	21605.8	14594.4	9636.56	6006.68	295844	113467	6482.17	4065.74	428464	281222	3483.58	2197.53	34445.3	24680.7	2537.71	1916.15	6769.42	3209.1	1108.22	746.693	4693.41	2565.78	1508.29	735.297	496.407	143.184
	P24	5629.32	4750.27	25238.6	29100.6	15941.4	18373	35572.9	37808.7	790.923	2256.91	4381.15	2256.91	199831	115463	855.047	1103.82	3448.37	3417.92	2225.56	1609.49	146518	34250.2	1153.47	1162.69	66067	76668.1	695.727	574.47	5487.07	5467.96	245.36	424.976	2580.06	910.063	126.16	218.516	1479.27	536.974	588.733	154.873	301.363	89.47
	P36	4209.59	3436.04	18445.1	5814.1	9899.35	1468.39	24284	3005.76	1085.96	1333.61	3779.22	1333.61	208832	115504	394.367	119.094	2050.33	505.511	1695.74	189.952	168832	56003	874.77	121.622	40768.2	5723.35	494.75	140.623	3712.81	311.71	120.483	108.016	2729.11	473.285	63.6767	110.291	1451.12	782.185	715.8	186.191	532.857	399.856
	P48	18113	24609.2	89711.8	118952	57183.9	74745.7	118600	150746	2403.1	10223.7	10776	10223.7	386338	390458	3659.11	5346.15	12260.7	16151.7	5831.11	5969.01	203846	111713	3580.53	4207.62	231008	301908	1931.8	2203.76	18216.9	22251.6	1290.83	1771.3	4670.59	3362.98	564.997	779.093	3614.28	2962.36	1157.1	693.579	303.543	186.242

## Sheet: Supplementary Table 2
Supplementary Table 2. Metabolite levels in kefir samples identified by GC-QqQ-MS
	Sample	2,3-butanodione		2,4-dimethylheptane		2-ethyl-1-hexanol		2-heptanol		2-heptanone		2-methyl-1-butanol		2-methyl-1-propanol		3-methyl-1-butanol		3-methyl-2-butanone		4-ethyl octane		4-methyl octane		4-methyl decane		Ethyl acetate		Vynil acetate		Acetoine		Acetic acid		Methyl benzoate		Methyl butanoate		Camphene		Glycol methacrylate		Hexanal		Methyl hexanoate		Ethyl lactate		Nonanal
	RO	1.01286	0.623051	0.0131971	0.0032806	0.00474574	0.00451196	0.0100075	0.000150516	0.0261129	0.00190804	0.0119241	0.0079644	0	0	0.0676365	0.0671924	0.130845	0.0141152	0.00285504	0.000155548	0.00288312	0.000379095	0.00811471	0.000285603	0.03598	0.000885206	0.092897	0.061634	0.0222999	0.0217799	0	0	0.112708	0.000476642	5.40844	0.794212	1.44556	0.101554	0.0794414	0.0410354	0.0138815	0.00243901	18.8784	2.87461	0.00339495	0.00294271	0.000258811	0.000448274
	R12	0.185204	0.0680049	0.0110926	0.00120692	0.00897451	0.00608554	0.00177657	0.0016319	0.00250237	0.00116584	0.0316284	0.0189319	0.0785297	0.0446464	0.200457	0.129399	0.086592	0.0756902	0.00223517	0.000822679	0.00234215	0.000210747	0.00621052	0.00219843	0.0486196	0.0133306	0.0130664	0.00547275	0.00147822	0.000489185	0.0228717	0.0139644	0.083736	0.00756742	0.00187413	0.00025522	0.869964	0.128613	0.039575	0.0339342	0.0149206	0.0084123	0.00705763	0.00472982	0.107312	0.0240079	0.000943311	0.000296013
	R24	0.10594	0.0544109	0.00947041	0.00381467	0.0204159	0.0111733	0.00360947	0.00154157	0.00296436	0.000994322	0.0619556	0.0137454	0.134672	0.0459212	0.342406	0.112081	0.130437	0.0862271	0.00261433	0.00107411	0.00196872	0.000763978	0.00855953	0.00378958	0.112906	0.0364754	0.00855942	0.00390422	0.00788787	0.00209544	0.0974	0.138407	0.123378	0.0997719	0.000778534	0.000906451	1.6649	1.75557	0.0752401	0.0687469	0.01827	0.0120348	0.00147387	0.00135234	0.243874	0.140512	0.00142052	0.000922504
	R36	0.450696	0.51295	0.0117437	0.00176389	0.0097194	0.000904734	0.00329064	0.00139262	0.00210314	0.000282039	0.0473719	0.00229637	0.107699	0.0183865	0.248619	0.0163434	0.0796147	0.0401243	0.00207869	0.000732146	0.00193728	0.000402669	0.00669524	0.00181141	0.139334	0.0125906	0.0093572	0.00101672	0.0461731	0.0146343	0.327189	0.479468	0.0556165	0.0152759	0.000905267	0.000896664	0.375521	0.114083	0.059482	0.0295933	0.00707609	0.00132678	0.000795432	0.000166422	0.428191	0.270818	0.000757871	0.000150379
	R48	0.422388	0.427832	0.0051928	0.000569989	0.011764	0.000312306	0.00291883	8.30046e-05	0.00156277	0.000339598	0.0455652	0.00879807	0.0974643	0.014412	0.256792	0.0494097	0.0649462	0.0332452	0.00145608	0.000254597	0.00112259	3.56994e-05	0.00441047	0.000302636	0.163678	0.0301728	0.00906969	0.00473716	0.0720096	0.0102437	0.218455	0.31903	0.0370377	0.00362145	0.00115944	0.000225581	0.221879	0.00378741	0.0231613	0.00912135	0.00255012	0.000557079	0.000584785	0.000108067	0.421272	0.130238	0.000286996	0.000256908
	PO	0.0242407	0.0283025	0.00720768	0.00050054	0.00388175	0.000207479	0.00294923	0.00510821	0.0141995	0.0237087	0.00323285	0.00325562	0.0277244	0.0340967	0.00323285	0.00325562	0.0420073	0.0117749	0.000407564	0.000156945	0.00130713	9.37751e-05	0.00129072	0.000181978	0.00582743	0.00455629	0.00187537	0.00167466	0.0147049	0.0253321	0.0101861	0.0176429	0.0374919	0.00777754	0.0260945	0.0334635	0.222436	0.0178571	0.00707423	0.00284798	0.000514019	0.000890307	0.00515623	0.00592778	0.0409507	0.0701642	8.22976e-05	0.000142544
	P12	0.108916	0.0169866	0.0137482	0.00506874	0.0057635	0.00179303	0.000962443	0.000910223	0.00158213	0.000262855	0.0330095	0.00902153	0.0603041	0.0163068	0.164864	0.0502906	0.0470528	0.01482	0.00152381	0.000446086	0.00260723	0.000685731	0.00519596	0.00127814	0.0322582	0.00830224	0.00992877	0.00277478	8.62293e-05	8.04149e-05	0.000392017	0.000678994	0.0319537	0.00486815	0.00143995	0.000812723	0.207036	0.0416843	0.00755418	0.00330819	0.00450125	0.00120383	0.000973057	0.000195025	0.0506796	0.00137458	0.0002327	0.000202009
	P24	0.117576	0.0455614	0.00964229	0.00512183	0.0162722	0.00528713	0.00325122	0.000389368	0.00184619	0.000568931	0.0751217	0.00368601	0.123391	0.0215357	0.332209	0.0391395	0.0540999	0.0208208	0.00221082	0.000705233	0.00211285	0.000811684	0.0071005	0.000587913	0.13678	0.0487977	0.0106248	0.00486664	0.000187194	0.000216078	0	0	0.0403977	0.00929466	0.000972415	0.000866411	0.255858	0.0680044	0.00966121	0.00307139	0.0156631	0.00735152	0.000512753	0.000248014	0.14674	0.00445483	0.00122538	0.000539611
	P36	0.0616307	0.0164414	0.00933766	0.00289418	0.0139261	0.00236874	0.00355358	0.000799245	0.00162804	0.000472447	0.0883986	0.0278781	0.140509	0.0237312	0.3765	0.0901954	0.045217	0.0103633	0.00190936	0.000259595	0.00179078	0.000346639	0.00661246	0.0016377	0.15157	0.0389877	0.0027914	0.00203717	0.00262044	0.00154312	0.00195213	0.0033812	0.0308495	0.00575654	0.000251932	0.000436358	0.201133	0.0429651	0.00685717	0.00133358	0.0108508	0.00115827	0.000282909	0.000140039	0.316499	0.127545	0.000728397	0.000248504
	P48	0.07246	0.0259321	0.0175723	0.00780572	0.0219307	0.0209642	0.00512415	0.00202719	0.0014676	0.00107642	0.0921033	0.035335	0.167944	0.0496582	0.368314	0.106091	0.0475412	0.0153523	0.00110472	0.000617279	0.0030066	0.00154429	0.00807437	0.00486714	0.267628	0.0383622	0.0061422	0.00226796	0.00137562	0.0015604	0	0	0.0294951	0.0114051	0.00113717	0.000349784	0.186343	0.0677739	0.00719257	0.0023235	0.0039962	0.00103054	0.000302406	3.81566e-05	0.429681	0.195777	0.000264324	0.00023402
[truncated: 4 more columns]

## Sheet: Supplementary Tables 3 and 4
Supplementary Table 3. Metabolite levels in kefir samples identified by GC-MS-ToF using spectral libraries
	Sample	lactic acid		lactamide		ethanolamine		phosphate		urea		creatine		fucose		ornithine		beta-mannosylglycerate		Tyramine		4-hydroxylphenyllactic acid		myo-inositol		lactose		dehydroabietic acid		cellobiose		beta-gentiobiose
	RO	0.374163	0.0708123	0	0	8.10425	0.508041	22.2369	2.09083	45.9117	5.77882	3.72746	0.209843	1.5022	0.152791	0.233087	0.028347	0.756192	0.0943326	0	0	0	0	8.29766	0.875267	4271.23	787.343	1.51648	0.00497471	1.29399	0.155895	0	0
	R12	3.21408	0.788828	0.102015	0.0131389	2.10313	0.933717	2.08234	1.42241	10.69	7.04186	4.31717	0.656768	2.29656	0.413598	0.814532	0.123801	6.39058	1.06934	1.84652	0.388575	0.641312	0.10379	8.52496	1.76835	3864.04	504.197	1.68999	0.120238	0.737226	0.154175	1.21594	0.0650335
	R24	5.26597	1.24226	0.175484	0.0700736	1.19841	0.0703681	0.859866	0.50995	6.82075	0.298344	2.76694	1.26242	1.60581	1.02428	1.04518	0.0445222	12.9879	2.26992	3.27664	0.365799	1.44997	0.287618	12.4119	0.771276	3580.67	227.527	2.60952	0.187148	1.19964	0.2415	3.15743	0.828958
	R36	27.491	2.10618	1.34915	0.370929	6.61088	1.52643	7.78476	3.4825	30.144	4.63306	3.99627	1.05624	3.73435	0.879496	1.17748	0.204219	24.6841	5.16134	7.93048	1.19793	4.04003	0.848024	24.4642	1.85648	2902.91	62.829	15.3291	3.74751	4.88652	1.39963	20.1001	7.90013
	R48	22.7657	4.87888	1.1021	0.123368	5.49175	0.757819	7.02426	1.76361	23.4838	6.61407	3.77239	1.06195	3.76594	0.877571	2.33334	0.71124	21.8457	4.59211	8.43005	3.08398	3.78197	1.34717	20.6377	8.10988	2376.1	394.695	16.2223	2.4239	2.95462	0.838582	22.2552	8.21947
	PO	0.810451	0.338022	0	0	6.11141	1.36093	21.5983	4.84174	28.7473	4.60267	4.03031	0.694052	1.34095	0.258259	0.221562	0.0256918	0	0	0	0	0.202889	0.0312635	9.64985	1.18925	7900.37	464.487	2.22099	0.482777	1.68244	0.788898	0.123333	0.0321455
	P12	6.71825	1.2666	0.190506	0.0430072	3.34382	0.835243	3.70714	1.09094	21.9365	4.54458	3.68517	0.469815	1.97329	0.0804595	1.36535	0.170433	6.9703	0.467205	2.81833	0.113326	0.88318	0.164784	18.4163	0.798656	7053.15	591.3	8.02781	1.42055	5.57432	1.83228	4.06173	0.220289
	P24	6.81568	1.36842	0.480997	0.189708	4.50949	0.109255	4.31558	0.396517	22.126	3.07509	3.42167	0.525828	1.55603	0.248412	1.172	0.280666	7.37337	1.27078	2.79007	0.806199	0.852527	0.210722	15.8685	5.38182	6009.56	530.917	12.0437	0.508514	5.11745	1.08097	6.65474	1.76759
	P36	9.79843	2.2024	1.63766	0.910787	9.25794	2.50006	16.0007	1.98688	39.0787	2.89415	4.95874	1.75217	3.09939	0.871817	3.42087	2.03129	21.8221	12.1472	7.80473	6.03811	3.989	1.70845	20.1777	17.1115	4240.86	1207.35	24.7963	7.37242	3.98962	1.50925	17.254	2.93145
	P48	21.6258	4.70093	3.00304	1.42499	12.566	0.867667	27.4003	5.01256	62.8291	4.29017	8.25513	1.46251	6.33225	0.674006	4.66953	0.648133	52.5243	9.85481	11.398	2.84837	6.20244	0.642416	24.2718	8.67815	4322.05	339.185	35.5811	3.32785	7.37742	1.19536	43.603	2.99786
Supplementary Table 4. Metabolite levels in kefir samples identified by GC-MS-ToF using standards
	Sample	Alanine		Oxalic acid		Valine		Glycerol		Leucine		Isoleucine		Glycine		Proline		Serine		Succinic acid		Threonine		Fumaric acid		B-Alanine		Malic acid		4-hydroxyproline		GABA		Aspartic acid		Methionine		Xylitol		Glutamine		Glutamic acid		Phenylalanine		Fructose		Shikimic acid
	RO	14.8014	1.17428	1.83068	0.264635	51.6491	3.14277	51.9049	0.965722	6.94078	0.632954	1.89128	0.312279	50.0795	1.7317	4.5971	0.934101	2.71061	0.936383	21.8126	0.923446	2.3202	0.123547	0.667151	0.37857	1.02412	0.611186	0.56273	0.159099	1.86439	0.123731	12.2889	1.06336	1.38697	0.0240136	0.878562	0.162965	276.684	41.3923	11.3106	0.764599	4.04423	0.204512	0.662045	0.10812	1.49614	0.38872	1.7985	0.0682106
	R12	7.37366	1.11921	0	0	24.9128	9.7149	55.945	25.9317	2.40946	0.651144	21.2114	5.40796	21.7656	3.58589	110.861	13.3655	20.9582	1.57703	597.227	24.5914	21.4732	1.27605	0	0	0.611094	0.0641376	0	0	1.1273	0.135152	22.3087	2.19411	2.52264	0.608175	2.65056	0.589573	241.561	13.0242	60.6765	6.19912	39.5395	4.35578	16.4867	2.57969	4.7649	0.451862	3.48786	0.483659
	R24	6.36993	0.854611	0	0	17.3531	2.45384	18.1707	4.0157	0.992083	0.182899	8.96473	0.989482	4.2766	0.553445	36.3584	5.246	7.88247	1.42761	159.132	53.1238	9.05611	1.20026	0	0	0	0	0	0	0	0	14.0674	6.70252	1.0744	0.59167	1.69471	1.07635	137.907	31.1073	35.9006	15.9722	31.5861	1.76746	13.8114	5.91989	5.47928	3.15793	3.94109	1.61724
	R36	45.3291	10.9647	0	0	193.718	45.6866	220.061	52.8007	17.4952	3.04549	109.608	24.3082	36.1544	11.8043	352.197	86.3126	61.5374	21.3459	1180.89	239.67	71.9486	12.3751	0	0	0	0	0	0	0	0	118.4	33.461	8.02664	3.09575	5.18192	1.20663	227.63	41.8014	86.6876	16.1558	75.5973	12.5524	47.455	9.67064	12.9374	5.03048	8.05832	2.34736
	R48	36.9685	6.56166	0	0	169.29	41.4567	139.908	37.8997	13.7804	3.27489	99.1124	24.6883	29.8807	8.65762	320.95	87.8645	89.725	21.7152	843.59	131.881	95.7889	24.6158	0	0	0	0	0	0	0	0	110.365	39.2707	8.77221	1.17915	5.09106	2.25126	203.871	55.2088	105.039	30.554	83.2154	26.8784	47.3913	10.4845	5.85242	3.79476	54.6308	21.6682
	PO	14.8276	2.85279	0	0	17.7238	5.44458	43.7349	16.4428	0.303311	0.121858	1.41572	0.190173	43.5928	14.8931	8.114	3.38661	6.75098	1.33285	39.3537	17.5041	0.313833	0.041467	1.7029	0.517537	3.13754	0.775819	25.5076	6.0517	1.59858	0.262599	11.0785	2.18781	0.0364605	0.00560347	0.859083	0.271076	249.241	34.243	26.6638	6.25647	8.37362	1.36378	0.784759	0.287688	7.65583	0.30109	1.59455	0.926574
	P12	13.2473	3.47994	0	0	41.8284	15.1101	54.2984	10.82	52.2893	9.62027	29.9057	8.09507	17.4018	5.81391	101.261	21.429	22.5371	6.48863	307.115	46.2402	18.6236	3.17903	0	0	0	0	0	0	0	0	19.9215	2.46815	3.02972	0.552172	2.62777	0.558256	216.576	29.2983	64.4289	8.15167	39.7124	5.18116	17.4072	2.48443	0	0	3.33671	0.697782
	P24	10.4615	2.55457	0	0	81.902	24.9067	64.7928	22.6733	97.6721	11.4921	54.4942	22.1834	36.5979	11.4508	177.081	76.4213	38.3096	15.37	422.145	135.894	36.7817	17.1027	0	0	0	0	0	0	0	0	26.9478	7.46639	3.94381	1.02861	1.60207	0.661199	235.839	15.3177	68.6041	14.0131	45.7223	13.3815	19.9319	5.66701	0	0	2.68478	0.482545
	P36	22.1114	5.16145	0	0	214.076	71.1652	318.651	133.878	19.5117	7.79669	138.382	35.0184	52.0298	13.8624	488.446	93.8739	117.583	28.2334	1537.08	292.899	122.842	37.2863	0	0	0	0	0	0	0	0	54.562	9.60664	20.977	7.40183	7.27049	1.90115	263.763	16.3951	216.459	100.016	131.013	45.3953	53.9026	25.2101	0	0	46.9523	18.8311
	P48	19.1869	6.5225	0	0	240.415	62.4128	355.687	111.826	300.446	43.8664	158.816	40.0971	50.6813	10.6251	470.492	115.745	125.926	34.79	1395.89	344.316	138.205	41.3047	0	0	0	0	0	0	0	0	54.562	9.60664	16.7602	2.66904	7.96044	1.86164	229.34	21.7689	168.352	40.2142	116.168	22.426	45.5221	11.1522	0	0	79.2933	16.1458
[truncated: 16 more columns]

## Sheet: Supplementary Table 5
Supplementary Table 5. Metabolite levels in kefir samples identified by UHPLC-QToF-MS
	Sample	Acetylcarnitine		Alanine		Butyric acid		Creatine		Creatinine		Glycerophosphocholine		Hippuric acid		Hydroxybutyric acid		Isoleucine		Pantothenic acid		Phenylalanine		Tyrosine		Proline		Phosphocholine		Valine
	RO	8.53182	0.570869	0.175859	0.0130691	0.105961	0.017481	6.36619	0.499142	0.176469	0.00561194	13.276	0.759313	0.150221	0.00699703	0.385861	0.0853569	0.0233195	0.00377843	0.0679558	0.00643113	0.0444235	0.0058565	0.0610968	0.00785148	0	0	14.966	0.517362	8.31934	1.51647
	R12	7.3311	0.678864	0.222718	0.0287043	0.0556262	0.00899778	8.16933	1.21176	0.282914	0.0267464	10.7242	0.681542	0.0589289	0.00850776	0.197557	0.0408054	0.179639	0.0177424	0.0465161	0.00636558	0.930407	0.0796202	0.307609	0.0314432	0.334026	0.0755414	12.2626	0.865293	5.85454	0.916277
	R24	7.49745	0.527489	0.228445	0.0274374	0.0475901	0.00969914	8.73559	0.572612	0.333821	0.0279511	8.89767	1.2081	0.0441984	0.00567193	0.183421	0.0134589	0.267413	0.021849	0.135134	0.157983	1.31942	0.112771	0.407718	0.0364267	0.479483	0.0503422	12.2529	0.284135	6.33541	0.704562
	R36	5.16841	1.75392	0.114909	0.0724142	0.0153227	0.0137554	5.02378	2.40359	0.277719	0.113433	6.79101	2.0094	0.00612844	0.0106148	0.0687368	0.0514946	0.335199	0.0474273	0.203633	0.042368	1.66266	0.0847106	0.463247	0.117359	0.313927	0.212608	9.34535	1.91063	3.67448	1.67533
	R48	6.3394	0.136532	0.136279	0.00547547	0.0179601	0.00228887	6.54636	0.0877893	0.407939	0.0110334	7.49444	1.2008	0	0	0.0842007	0.0287008	0.384978	0.0684552	0.202142	0.00601807	2.05468	0.194105	0.668997	0.00468819	0.478946	0.0605138	10.7775	0.123677	4.77202	0.108915
	PO	3.98591	1.90787	0.0550486	0.0363402	0.021435	0.0168494	2.73613	1.48705	0.0914015	0.0238468	8.08333	3.25542	0.0798164	0.0121925	0.0783626	0.076369	0	0	0.190425	0.00260457	0.0162864	0.015045	0.0125869	0.00811356	0.00625934	0.00695977	11.2132	2.74466	2.34997	1.40219
	P12	5.04777	0.638875	0.10477	0.0268581	0.0222885	0.00545627	5.01296	1.0334	0.197456	0.0329239	8.92111	1.14253	0.0429344	0.00488316	0.0817672	0.0217136	0.140434	0.00464244	0.162571	0.00397239	0.793353	0.0426337	0.196928	0.011649	0.147569	0.0399483	10.427	0.933064	2.94145	0.502728
	P24	4.4931	0.0977185	0.0838929	0.00712214	0.00804265	0.00709042	4.4871	0.296299	0.168485	0.00947242	7.37327	0.159578	0.0252904	0.00972421	0.0407565	0.00510271	0.165342	0.0299443	0.160841	0.0115489	1.08441	0.176096	0.281586	0.0295045	0.152607	0.0429571	10.2178	0.286319	2.43799	0.081809
	P36	4.04967	1.02693	0.0642511	0.0232972	0	0	3.59131	1.33426	0.180217	0.0425388	6.23496	1.3242	0.00756422	0.00759473	0.0186572	0.00833867	0.245874	0.0165825	0.154564	0.00602022	1.47391	0.232604	0.37307	0.129328	0.140879	0.084902	9.11611	1.91361	2.04871	0.641474
	P48	4.26789	0.179146	0.074748	0.00814615	0	0	3.83907	0.265543	0.235969	0.00248385	6.10019	0.36065	0	0	0.0180283	0.00361025	0.333443	0.0268893	0.149147	0.0020945	1.80261	0.0942377	0.479388	0.0218625	0.176536	0.0153596	9.21937	0.357405	2.20255	0.173798
