# Supplementary material for: Combined metabolomic and NIRS analyses reveal biochemical and metabolite changes in goat milk kefir under different fermentation times
Source: Preprints.org preprint supplement (doi:10.20944/preprints202406.0780.v1), 2024-06-12
Supplement: Supplementary file 2 [file supplementary]

## SUPPLEMENTARY FIGURES

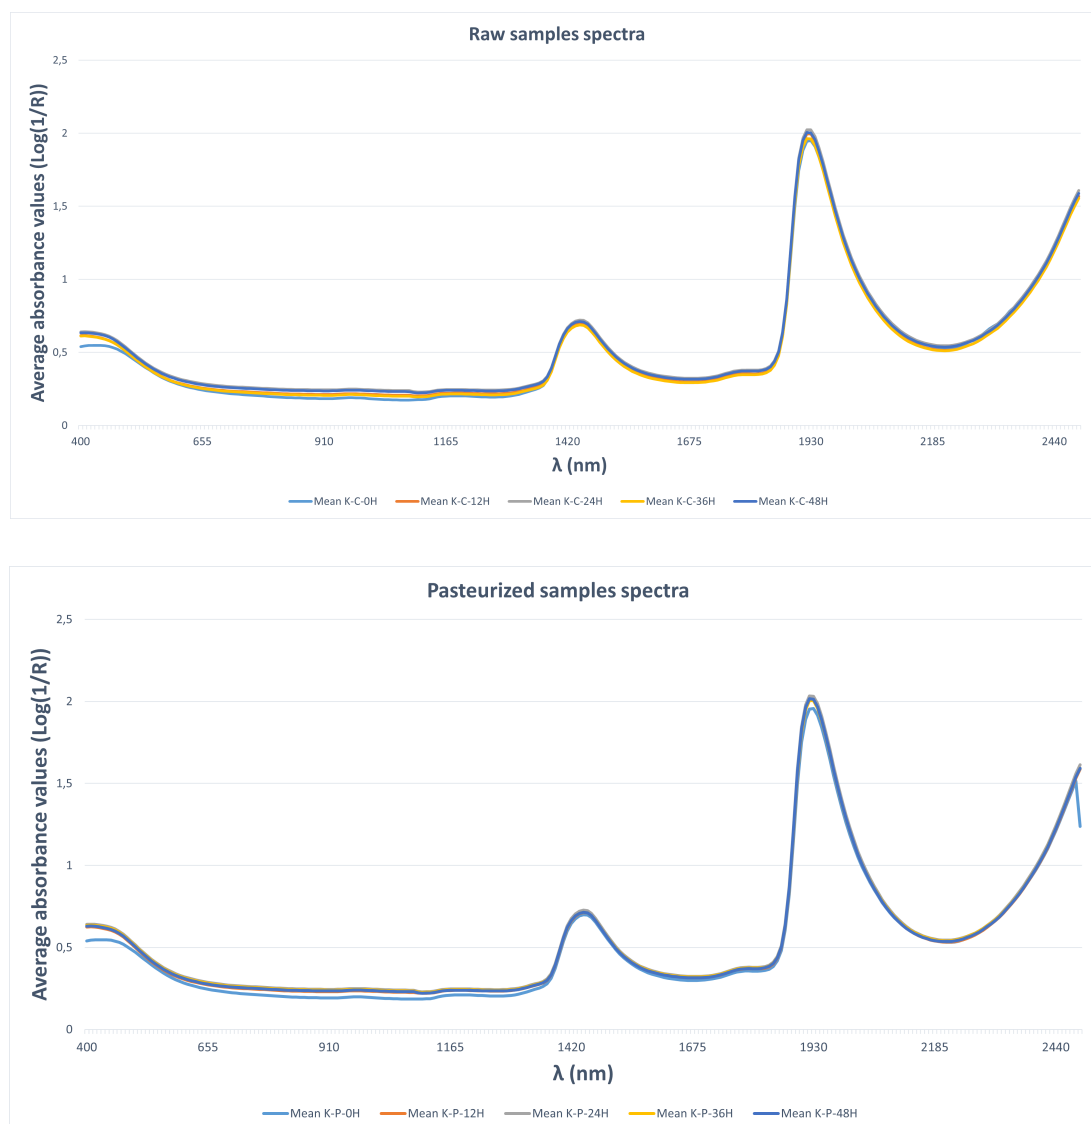

**Figure S1.** NIRS spectra of goat milk kefir. A) Raw milk kefir; B) Pasteurized milk kefir.

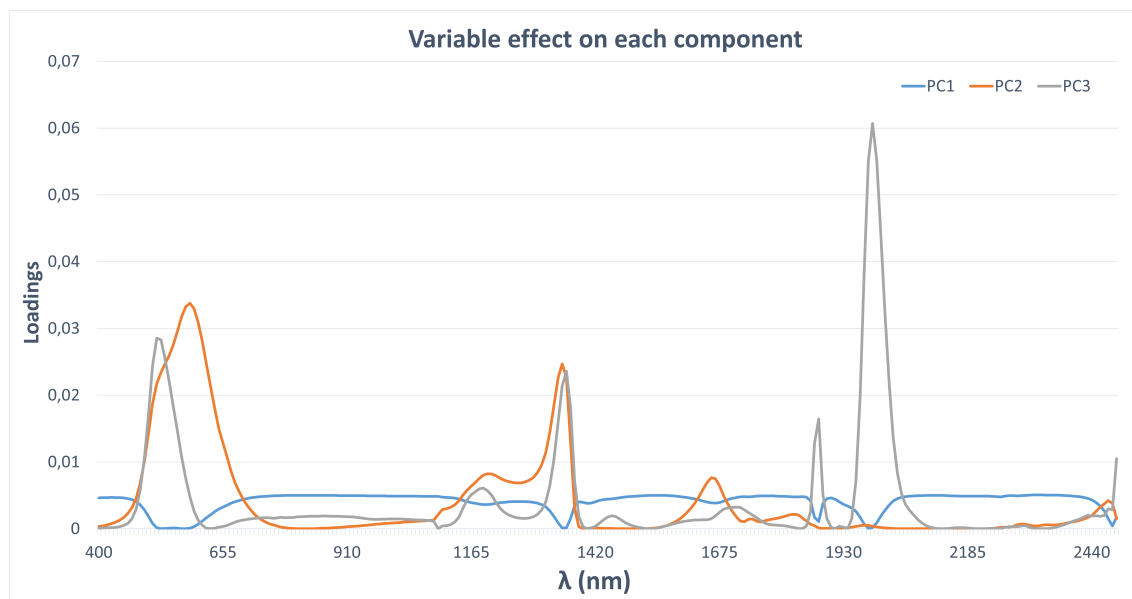

**Figure S2.** Principal component analysis (PCA) loading plots of the three first principal components of goat milk kefir.
